# Supplementary material for: Genomic analysis of LPS-stimulated myeloid cells identifies a common pro-inflammatory response but divergent IL-10 anti-inflammatory responses
Source: PubMed Central journal article supplement (PMC4650320; doi:10.1038/srep09100), 2015-03-13
Supplement: srep09100-s1.pdf [file srep09100-s1.pdf]

# Genomic analysis of LPS-stimulated myeloid cells indicates a common pro-inflammatory response but divergent IL-10 anti-inflammatory responses

Andrew Paul Hutchins, Yoshiko Takahashi, Diego Miranda-Saavedra

## List of Supplementary Files

Table S1. RNA-seq data from this study and library attributes and statistics.

Table S2. Lists of differentially expressed genes due to IL-10, LPS in each cell type.

Table S3. Lists LPS differentially genes specific to each cell type and in all 5 cell types, and any 4, 3 and 2 cell types.

Table S4. Lists AIR/not-AIR differentially expressed genes.

Table S5. Lists of IL-10 differentially regulated genes differentially genes specific to each cell type and in all 5 cell types, and any 4, 3 and 2 cell types.

Figure S1. Representative flow cytometry results for macrophages, neutrophils, dendritic cells, mast cells and eosinophils.

Figure S2. Full-length Western blots for STAT3 and pY705-STAT3 for Figure 1.

Figure S3. GM-CSF maturation of neutrophils enhances the anti-inflammatory response

Figure S4. RNA-seq expression of key IL-10 signaling pathway genes

Figure S5. Histogram of Pearson correlations for the biological replicates used in this study

Figure S6. Twenty families of signaling factors and their response to IL-10 and LPS

Figure S7. The full annotated version of Figure 5B

Figure S8. IL-10/STAT3 activates a 'core' of genes in a cell type independent manner

## Supplementary Methods

### Western blots, qPCR and flow cytometry

Western blots were performed using typical laboratory procedures with antibodies to STAT3 (1:2000, C-20, Santa Cruz), phospho-Tyr705-STAT3 (1:1000, D3A7, #9145, Cell Signaling) and GAPDH (1:20000, AM4300, Ambion). qPCR was performed on an ABI7900 using TOYOBO RT kits and SYBR. Primers used in this study: TnfF: 5'-TCCAGGCGGTGCCTATGT-3', TnfR: 5'-CACCCGAAGTTCAGTAGACAGA-3', Cxcl10F: GACGGTCCGCTGCAACTG-3', Cxcl10R: 5'-GCTTCCCTATGGCCCTCATT-3', Il12bF: 5'-ATTGAACTGGCGTTGGAAGCAC-3', Il12bR: 5'-TCTTGGGCGGGTCTGGTTTG-3', Il10F: 5'-GATTTTAATAAGCTCCAAGACCAAGGT-3', Il10R: 5'-CTTCTATGCAGTTGATGAAGATGTCAA-3', Gata1F: 5'-ACTTTCCAGTCCTTTCTTCTCTCC-3' Gata1R: 5'-GCCGTTGCTCCACAGTTTCCAC-3'. Antibodies used for flow cytometry: Mac-1-biotin (M1/70, BD Pharmingen), Ly6G/Gr-1-biotin (RB6-8C5, BD Pharmingen), Siglec-F-PE (E50-2440, BD Pharmingen), FcRE1a-FITC (MAR-1, Biolegend),

anti-CD11c (N418, Biolegend) and Streptavidin-FITC (Biolegend). Flow Cytometry was performed on a BD FACS Calibur.

Figure S1

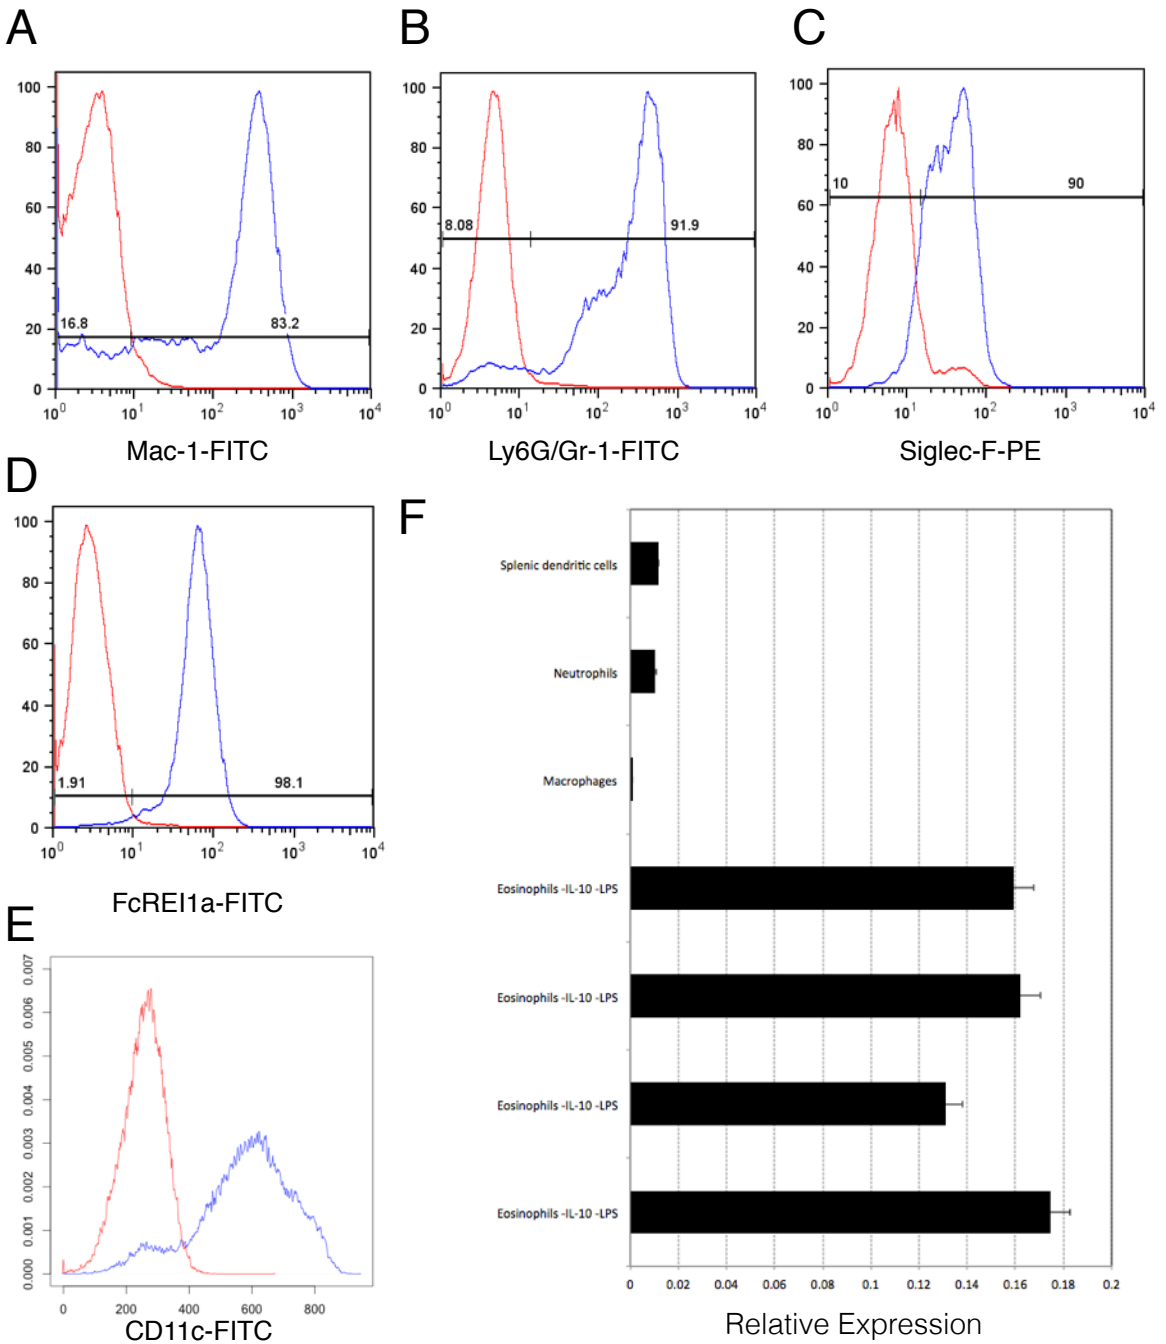

**Figure S1.** Representative flow cytometry results for (A) Macrophages stained with anti-Mac-1 (CD11b/I $\gamma$ g $\alpha$ ), (B) Neutrophils stained with anti-Gr-1-FITC (C) Eosinophils stained with anti-Siglec-F-PE and (D) BMMC stained with anti-FcRE1 $\alpha$ -FITC. (E) splenic dendritic cells stained with anti-CD11c-FITC. Red histograms are unstained cells, blue histograms are stained with the appropriate antibody. (F) qRT-PCR measure of Gata1 expression in eosinophils. Expression is measured relative to Gapdh expression.

Figure S2

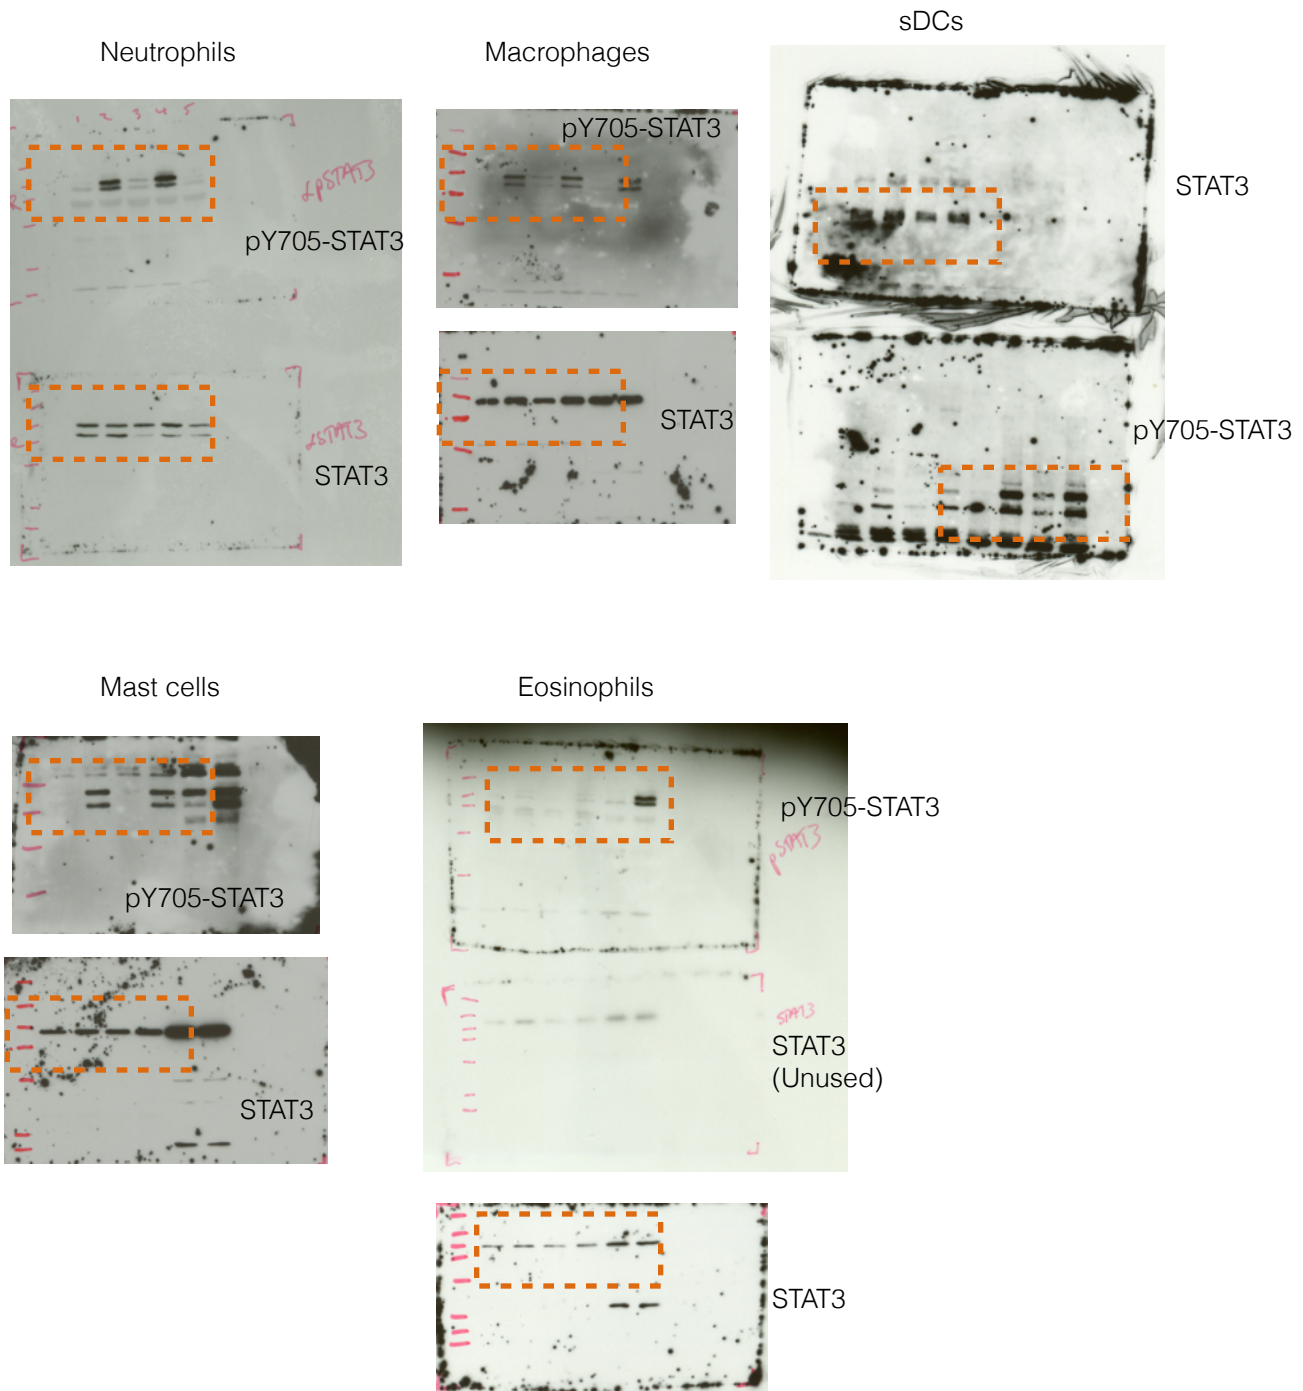

**Figure S2.** Full length Western blots for STAT3 and pY705-STAT3 for Figure 1. The approximate locations of the crop are marked with an orange box. Antibodies used were anti-STAT3 (1:2000, C-20, Santa Cruz) and phospho-Tyr705-STAT3 (1:1000, D3A7, #9145, Cell Signaling).

Figure S3

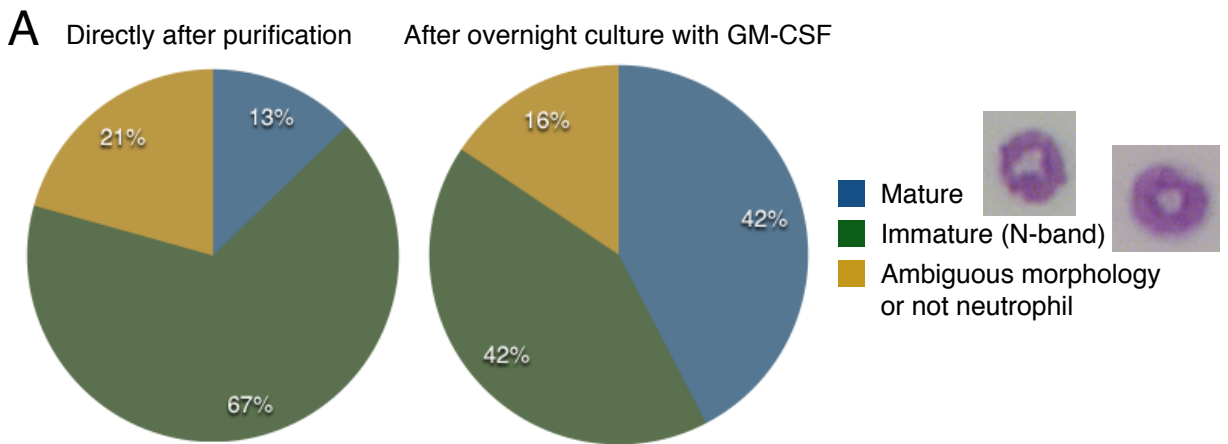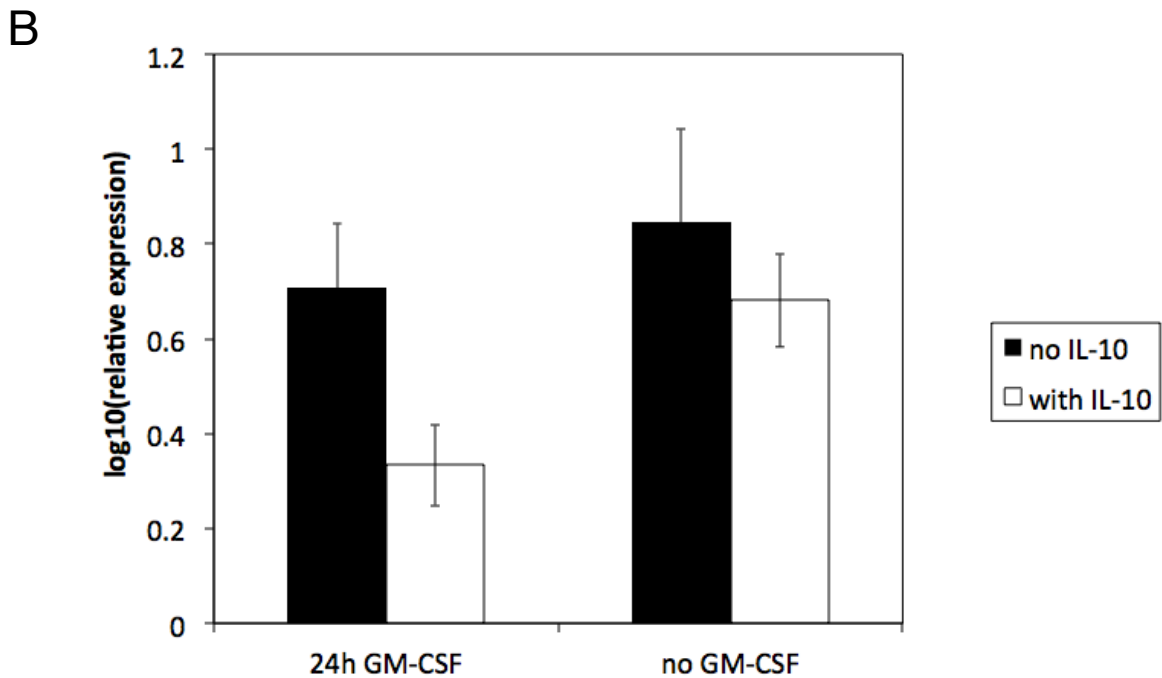

**Figure S3.** GM-CSF maturation of neutrophils. (A) Morphology of neutrophils immediately after purification from the bone marrow or after 24 hours of treatment with 10 ng/ml GM-CSF. (B) Suppression of Tnf (TNF $\alpha$ ) mRNA is improved after maturation overnight.

Figure S4

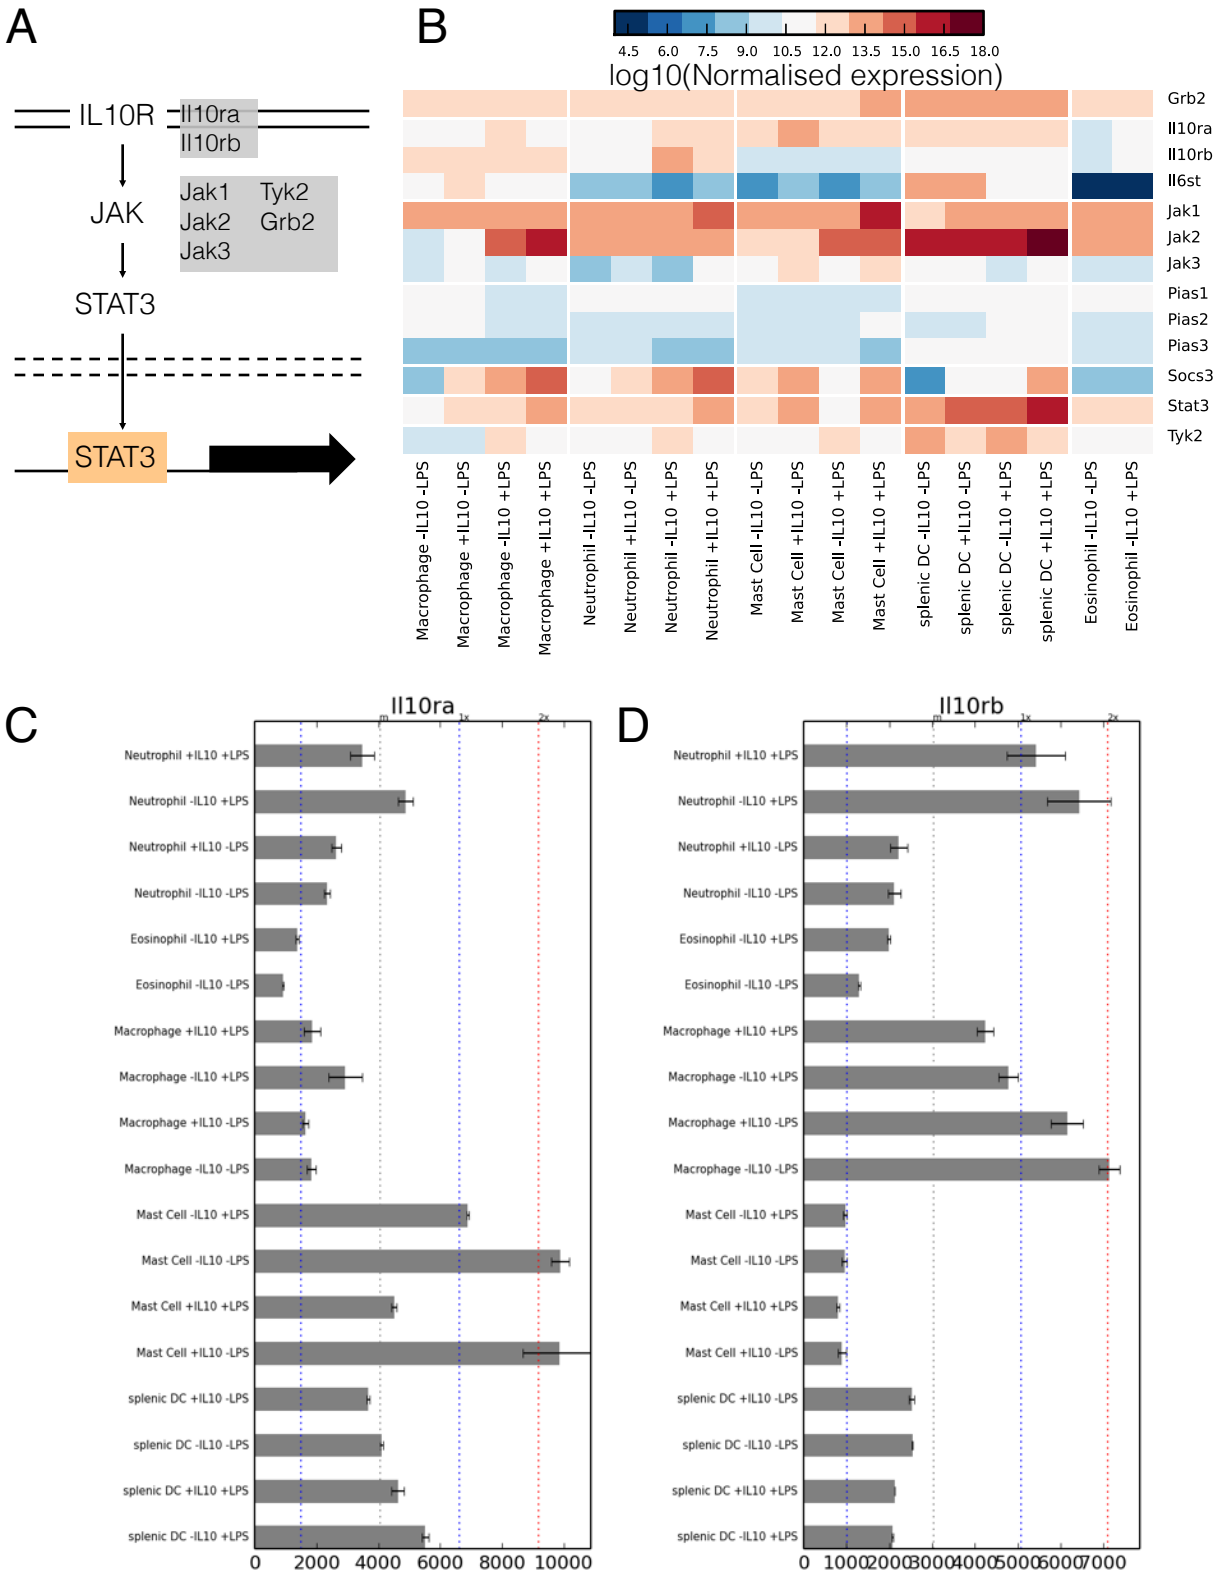

**Figure S4.** RNA-seq expression of key IL-10 signalling pathway genes. A. Schematic of IL-10/STAT3 signalling pathway activation. Important genes are shown in grey boxes. B. Heatmap of RNA-seq gene expression for a selection of IL-10/STAT3 signalling related genes. C and D. Normalised expression tag counts for IL10ra (C) and IL10rb (D). Error bars are standard error of the mean between the biological replicates.

Figure S5

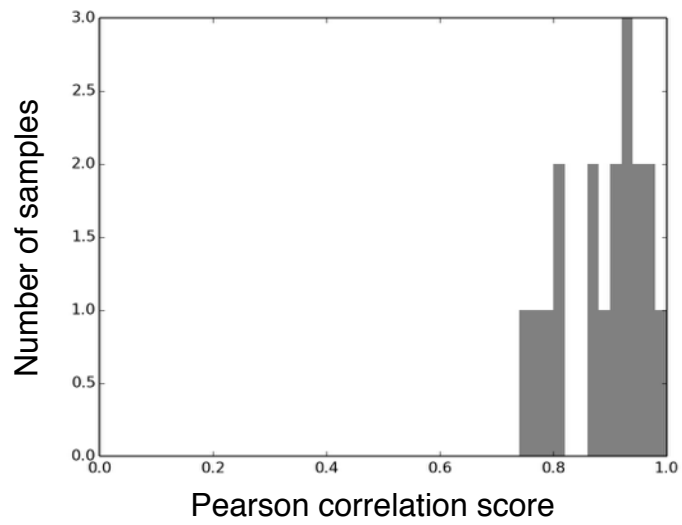

**Figure S5.** Histogram of Pearson correlation scores for biological replicate RNA-seq samples in this study.

Figure S6

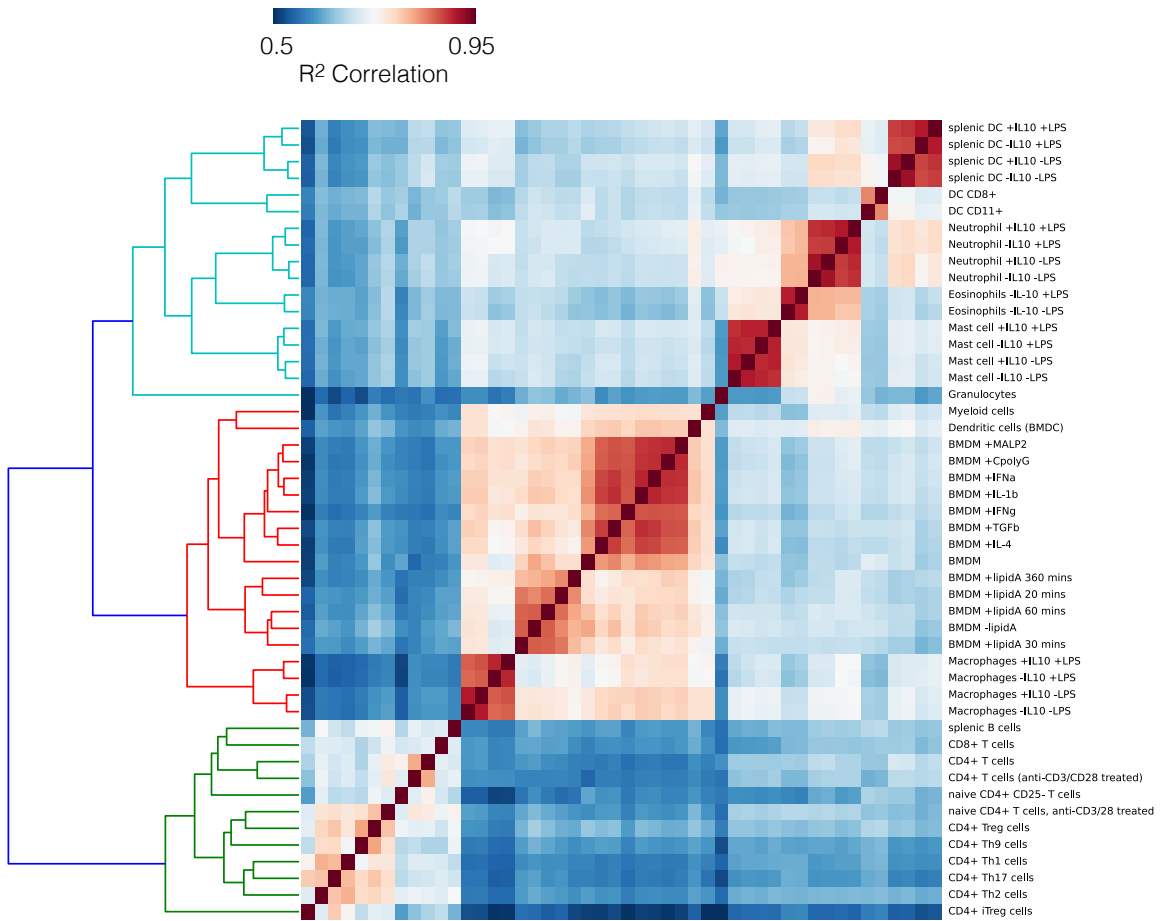

**Figure S6.** Global comparison of myeloid and lymphoid cell type expression signatures. RNA-seq data from a selection of mouse immune cell types were hierarchically clustered based on their pair-wise coefficient of determination (R<sup>2</sup>). Macrophages cluster close to other myeloid cell types, but remain distinct from bone-marrow derived macrophages (BMDM) and dendritic cells. Granulocytes (neutrophils, eosinophils, mast cells) form their own branch, away from macrophage cells, but still within the myeloid cell branch. Lymphoid cells form a separate cluster distinct from other myeloid cells. Other RNA-seq libraries reanalyzed were GSE20898 (Wei et al., 2011, PMID:21867929), GSE28666 (Hebenstreit et al., 2011, PMID:21654674), GSE29209 (Grabherr et al., 2012, PMID:21572440), GSE31530 (Hutchins et al., 2012, PMID:22323479), GSE34550 (Hutchins et al., 2012, PMID:22884873), GSE36026, GSE38371 (Ostuni et al., 2013, PMID:23332752), GSE38892 (Bhatt et al., 2012, PMID:22817891), GSE39524, GSE39756 (Li et al., 2012, PMID: 22992523), GSE40350 (Ring et al., 2012, PMID:23104097), GSE40463 (Vahedi et al., 2012, PMID:23178119), GSE43504 (Barlow et al., 2013, PMID:23352430), GSE55385 (This study).



Figure S7

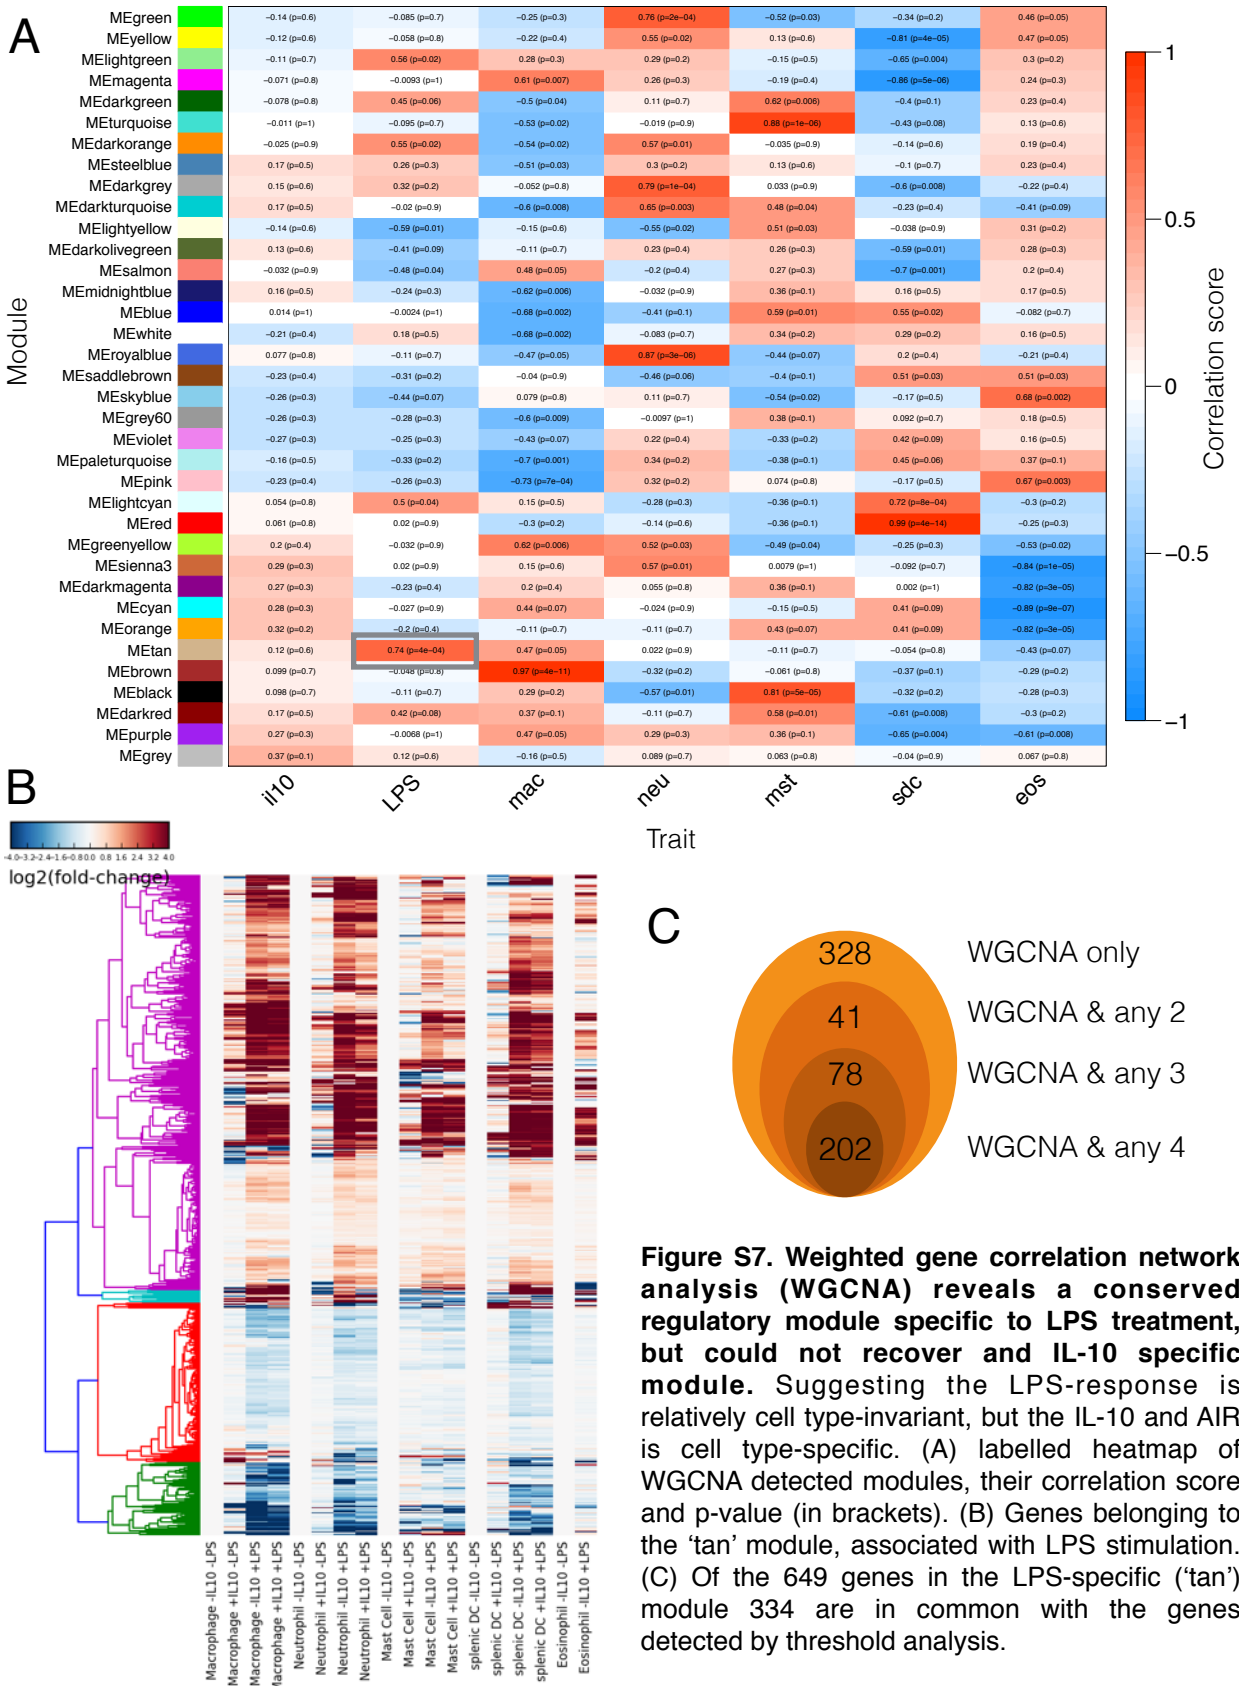

**Figure S7. Weighted gene correlation network analysis (WGCNA) reveals a conserved regulatory module specific to LPS treatment, but could not recover and IL-10 specific module.** Suggesting the LPS-response is relatively cell type-invariant, but the IL-10 and AIR is cell type-specific. (A) labelled heatmap of WGCNA detected modules, their correlation score and p-value (in brackets). (B) Genes belonging to the ‘tan’ module, associated with LPS stimulation. (C) Of the 649 genes in the LPS-specific (‘tan’) module 334 are in common with the genes detected by threshold analysis.

Figure S8

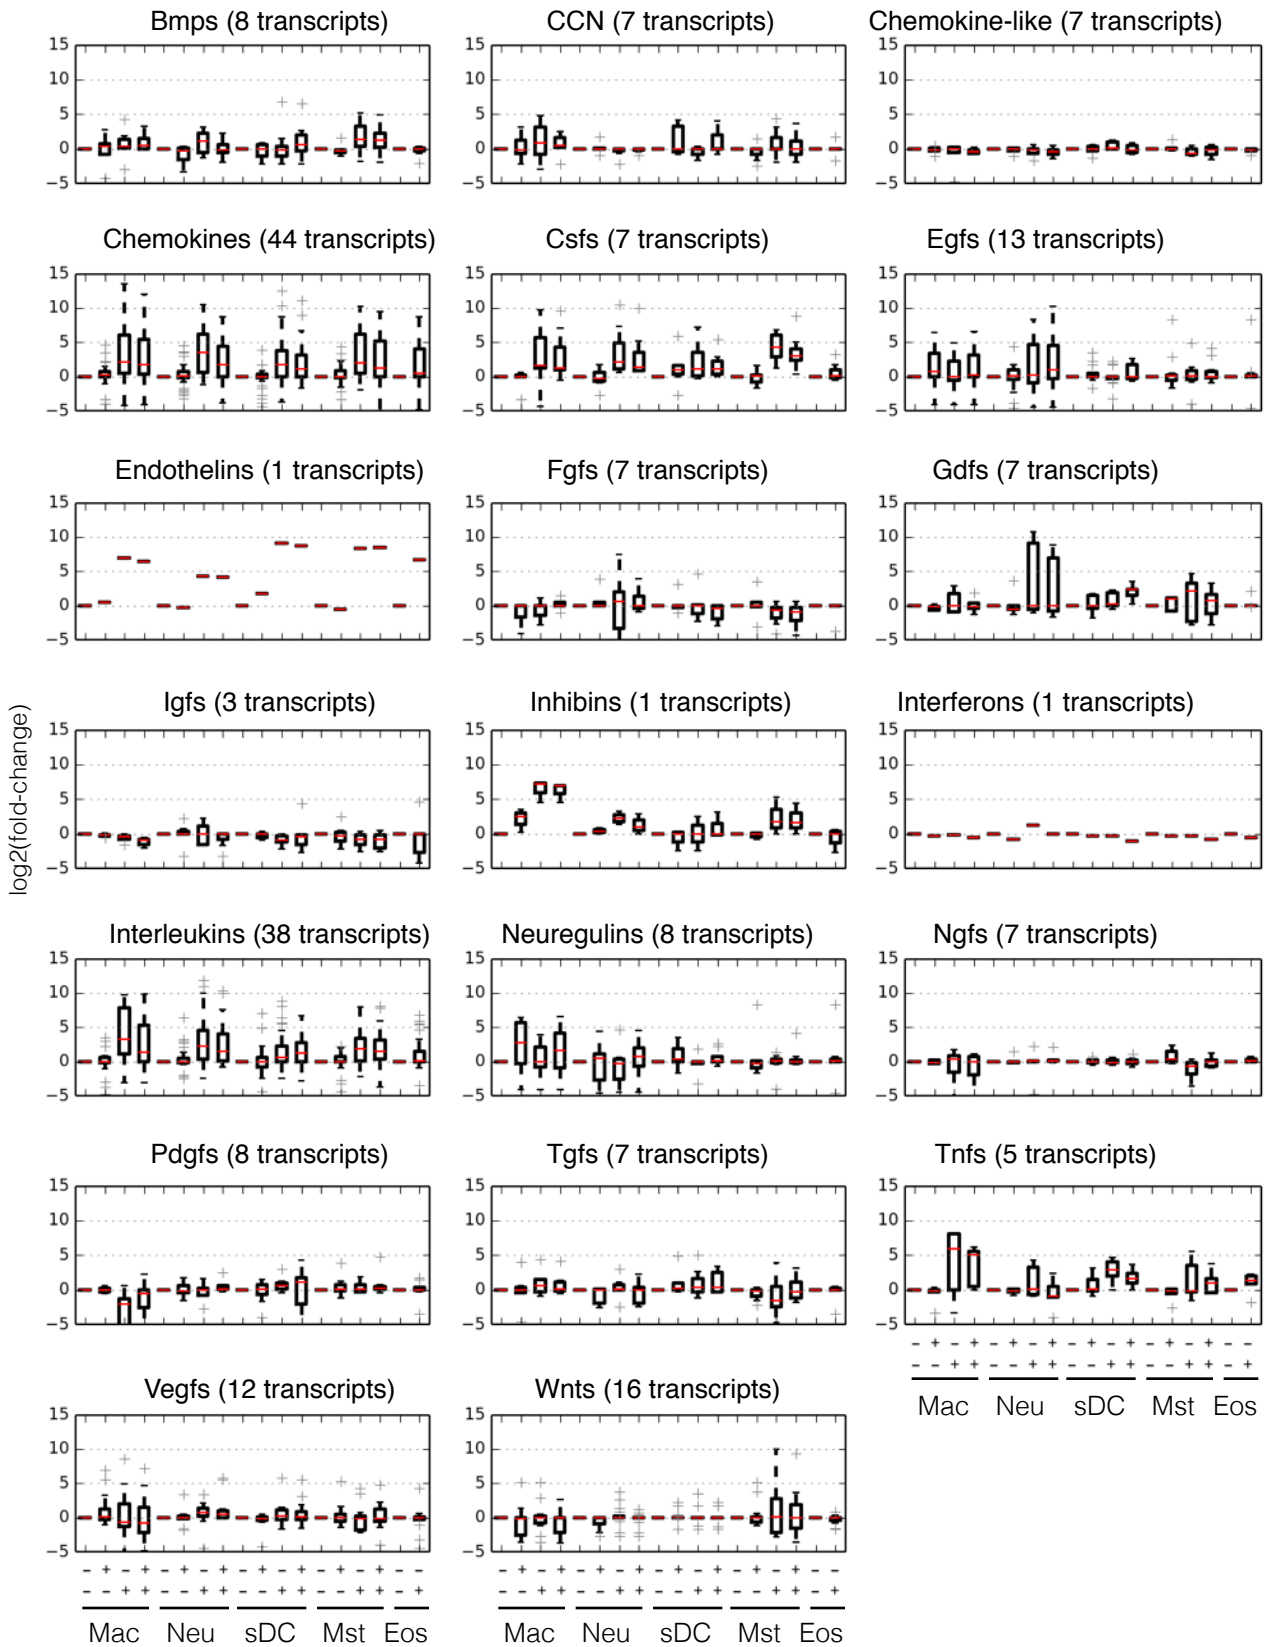

**Figure S8.** Twenty families of signalling factors and their response to IL-10 and LPS. The families are indicated and the number of expressed transcripts in our RNA-seq data is indicated. Expression is log<sub>2</sub>(fold-change).

Figure S9

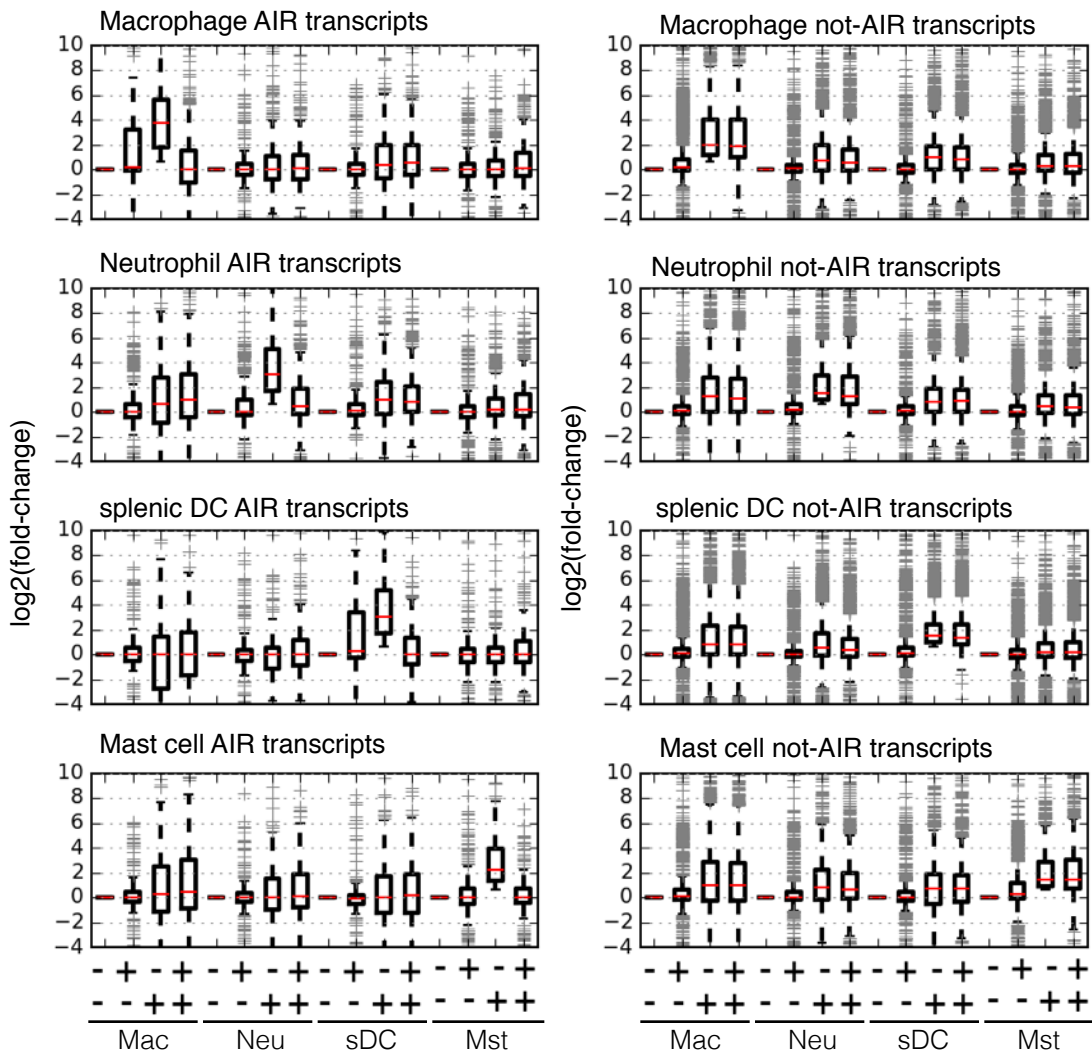

**Figure S9. AIR transcripts are cell type-specific.** In each case only the AIR genes specific to the indicated cell type are significantly down-regulated when IL-10 is added. Transcripts that were in 'any 2' cell types (The Venn overlap from Fig. 4B) were removed to give only cell type-specific genes and then compared in the other cell types. AIR genes are indicated on the left, not-AIR genes on the right.

Figure S10

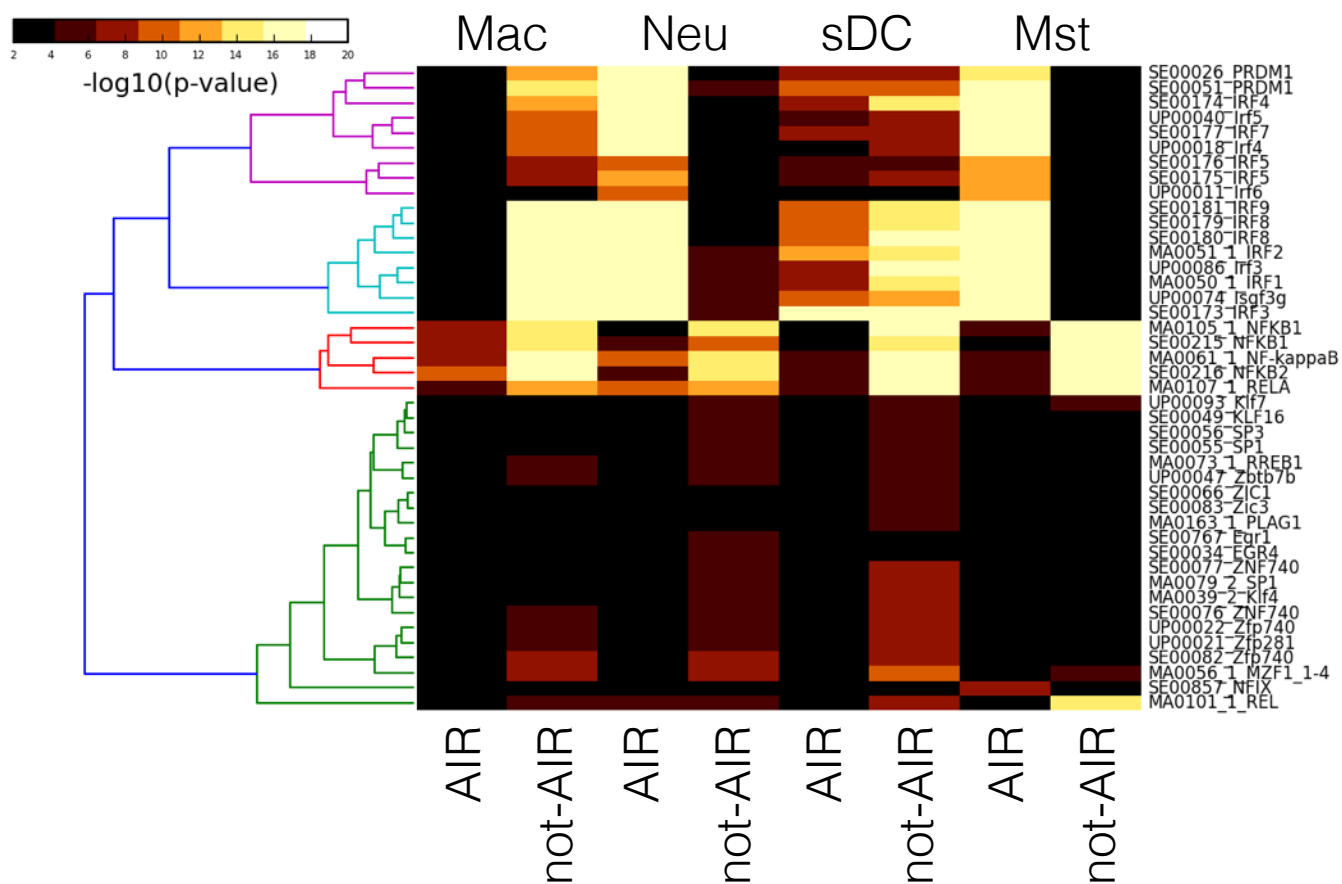

**Figure S10.** The full annotated version of Figure 5B. Transcription factor motif names are indicated on the right. The first two letters of the annotated name indicate the database origin; MA=JASPAR, UP=UniProt, SE=Jolma et al., 2013; Cell.

Figure S11

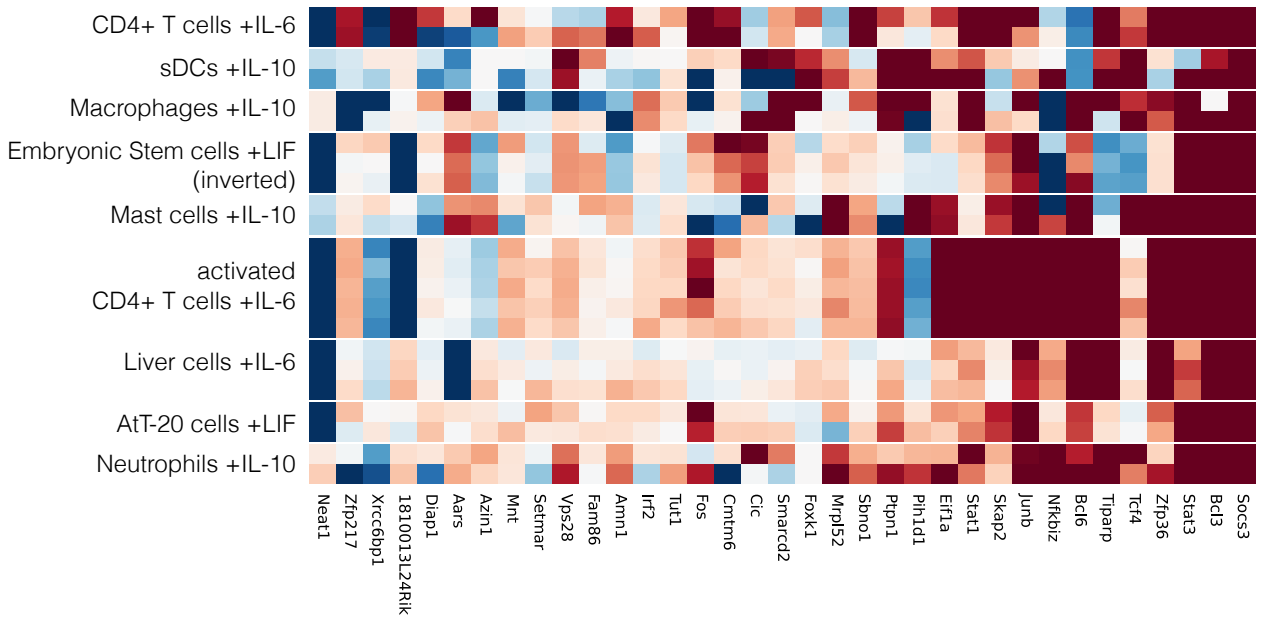

**Figure S11.** IL-10/STAT3 activates a ‘core’ of genes in a cell type independent manner. Updated heatmap from Hutchins et al., 2013; NAR, incorporating the new data from this study. The expression of the closest genes within 200 kb of the ‘shared overlap’ was measured in a series of gene expression microarray and RNA-seq data sets. Expression data are reversed in ESCs for clarity, but is otherwise down-regulated upon removal of LIF whereas all other treatments show up-regulation in response to cytokine stimulation. Data are from a CD4+ T cells treated with IL-21 (GSE19198), naive CD4+ T cells treated with IL-6 (GSE21671), ESCs upon withdrawal of LIF from the medium (GSE27708), peritoneal macrophages stimulated with IL-10 (GSE31529), AtT-20 cells treated with LIF (GSE19042), liver cells stimulated with IL-6 (GSE21060) and the RNA-seq samples described in this study (GSE55385).
